# Supplementary material for: Phase 1 and preclinical profiling of ESM‐HDAC391, a myeloid‐targeted histone deacetylase inhibitor, shows enhanced pharmacology and monocytopaenia
Source: PubMed Central journal article supplement — Br J Clin Pharmacol. 2022 Jul 11;88(12):5238–56. doi: 10.1111/bcp.15428 (PMC9796293; doi:10.1111/bcp.15428), 2022-07-11
Supplement: BCP-88-5238-s002.pdf [file BCP-88-5238-s002.pdf]

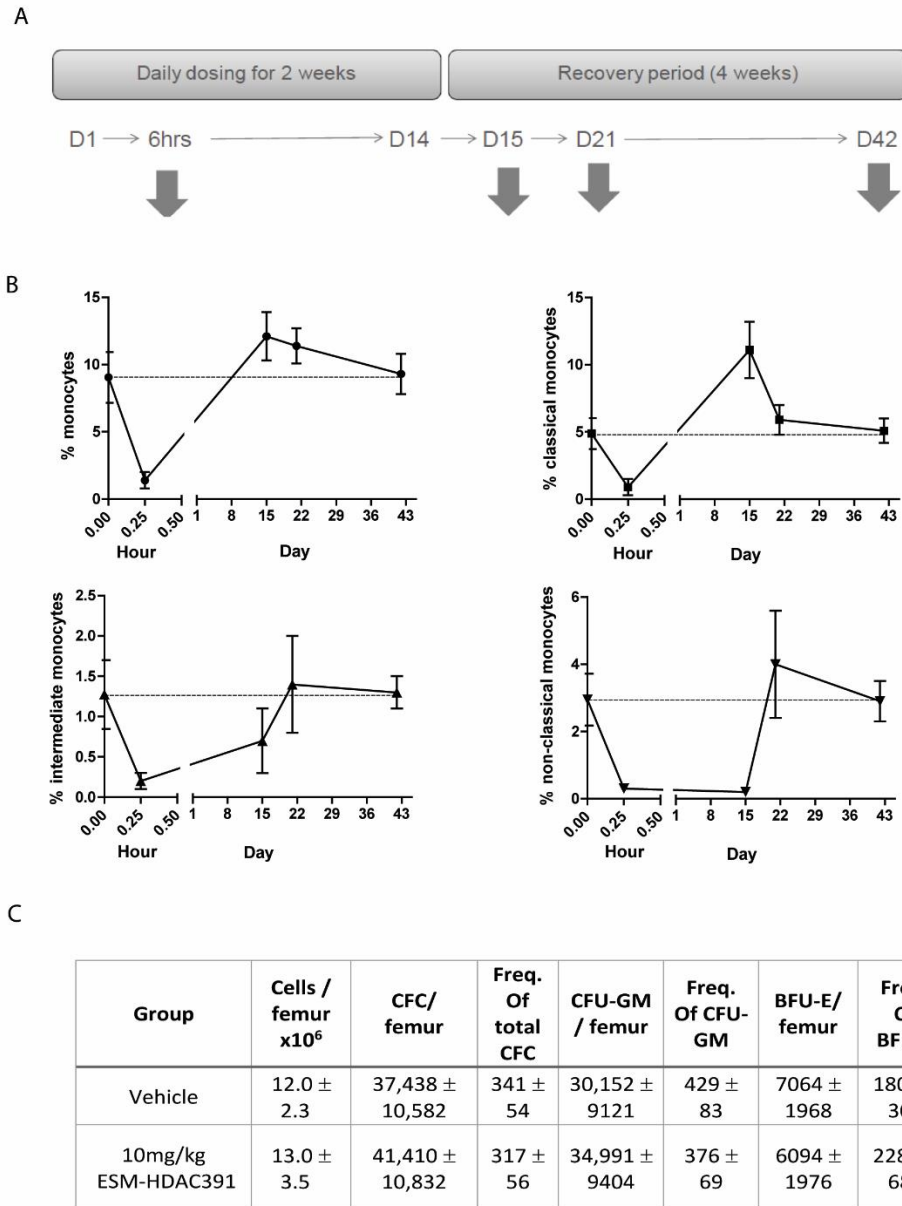

**Figure S2 Consequences of 14-day dosing of ESM-HDAC391 on circulating monocytes and bone marrow progenitor cells in CES1/Es1e<sup>l0</sup> mice.**

(A) Study schematic, consisting of a 2-week period with intraperitoneal dosing of ESM-HDAC391 (10 mg/kg) vs. vehicle, followed by 4 weeks recovery. Arrows indicate analysis of groups of mice harvested on Day 1 (6 h after dosing, to confirm monocytopenia), Day 15 (the first day off-dose), Day 21 and Day 42. (B) Percentages of indicated monocyte populations analysed on the days indicated by arrows above. (C) Numbers of bone marrow progenitor cells (total CFC, BFU-E, CFU-GM) quantified by colony forming assays in bone cultures from ESM-HDAC391 and vehicle treated mice at Day 21.
