# Supplementary material for: Phase 1 and preclinical profiling of ESM‐HDAC391, a myeloid‐targeted histone deacetylase inhibitor, shows enhanced pharmacology and monocytopaenia
Source: PubMed Central journal article supplement — Br J Clin Pharmacol. 2022 Jul 11;88(12):5238–56. doi: 10.1111/bcp.15428 (PMC9796293; doi:10.1111/bcp.15428), 2022-07-11
Supplement: BCP-88-5238-s003.pdf [file BCP-88-5238-s003.pdf]

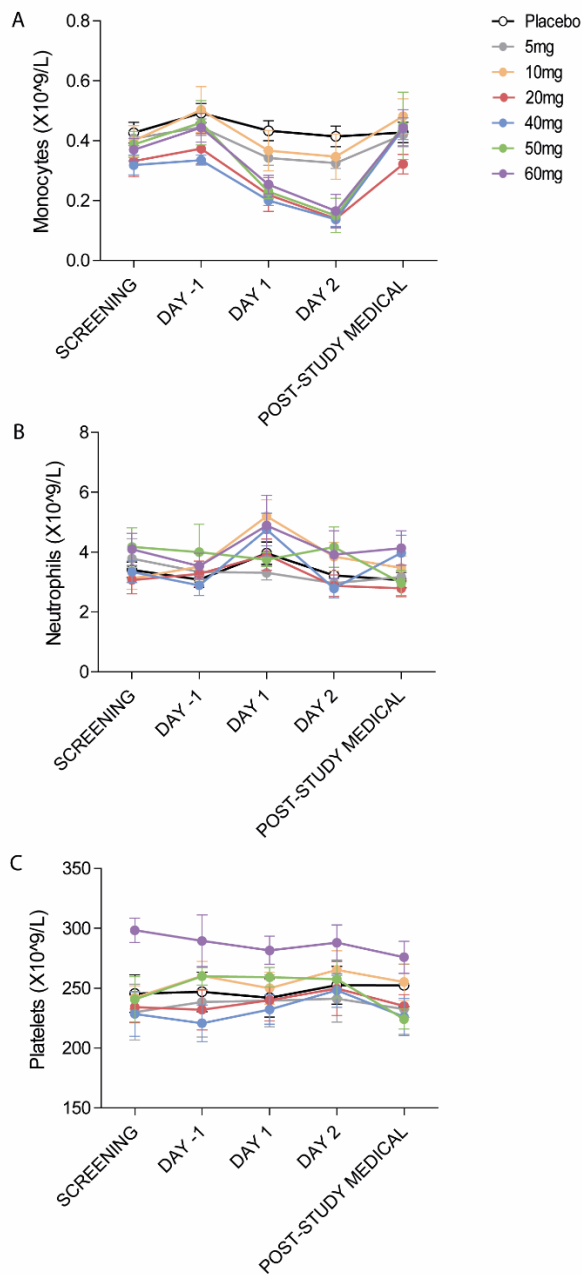

**Figure S1. Blood leukocyte counts in subjects dosed in Part A with ESM-HDAC391 versus placebo.**

Levels of monocytes, neutrophils and platelets are indicated in panels (A), (B) and (C), respectively. Data are shown as mean and standard error; n=6 for all treatment cohorts with the exception of 5 mg and 50 mg, which are n=4. Placebos (n=12) across all cohorts were pooled.
