# Supplementary material for: Phase 1 and preclinical profiling of ESM‐HDAC391, a myeloid‐targeted histone deacetylase inhibitor, shows enhanced pharmacology and monocytopaenia
Source: PubMed Central journal article supplement — Br J Clin Pharmacol. 2022 Jul 11;88(12):5238–56. doi: 10.1111/bcp.15428 (PMC9796293; doi:10.1111/bcp.15428), 2022-07-11
Supplement: BCP-88-5238-s004.pdf [file BCP-88-5238-s004.pdf]

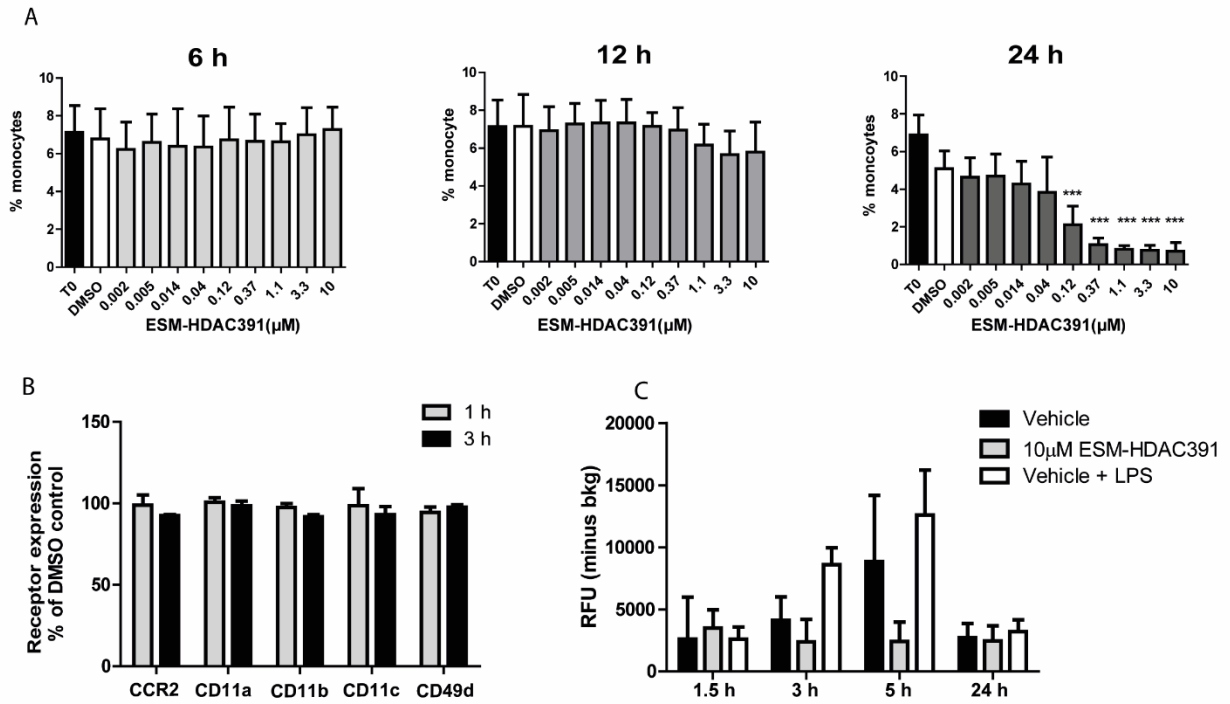

**Figure S3. Effects on viability, extracellular markers and adhesion of human monocytes.**

(A) Percentages of monocytes in human whole blood incubated with ESM-HDAC391 vs. placebo for 6, 12 or 24 h, respectively (n=4 at 6 h and 12 h and n=7 at 24 h). Data were analysed using a one-way ANOVA with Dunnett's post-test comparing treated samples with DMSO control. Monocyte numbers are reduced by compound at 12 hr, but unaffected at timepoints that mimic clinical depletion. (B) Normalised expression levels of monocyte trafficking molecules following 1 or 3 h incubation with ESM-HDAC391 (expressed relative to DMSO control treatment (n=2)). (C) Binding of isolated monocytes to a HUVEC monolayer for 30 min in the presence of ESM-HDAC391 compared with vehicle and vehicle + LPS control treatments (n=3). Data are presented as mean and standard deviation.
